# Update on macrolide–lincosamide–streptogramin, ketolide, and oxazolidinone resistance genes

Marilyn C. Roberts

Department of Environmental & Occupational Health Sciences, School of Public Health and Community Medicine, University of Washington, Seattle, WA, USA

**Correspondence:** Marilyn C. Roberts, Department Environmental & Occupational Health Sciences, Box 357234, School of Public Health and Community Medicine, University of Washington, Seattle WA 98195, USA. Tel.: +1 206 543 8001; fax: +1 206 543 3873; e-mail: marilyn@u.washington.edu

Received 2 November 2007; accepted 25 February 2008.  
First published online April 2008.

DOI:10.1111/j.1574-6968.2008.01145.x

Editor: Rustam Aminov

## Keywords

macrolide; lincosamide; streptogramin; ketolide; oxazolidinone; resistance.

## Introduction

The first macrolide, erythromycin, was discovered in 1952 and since then macrolides have had an important role in treating infectious diseases (Kirst, 2002). Erythromycin has a moderate spectrum of activity which has been enhanced with the production of the newer semi-synthetic derivatives such as azithromycin, clarithromycin, and more recently, the ketolides (Kirst, 2002). Macrolides are used to treat acute upper and lower respiratory tract infections due to a variety of Gram-positive bacteria, *Mycoplasma pneumoniae*, *Chlamydia pneumoniae*, *Legionella pneumophila*, *Haemophilus influenzae*, *Moraxella catarrhalis*, skin and soft tissue infections, sexually transmitted diseases caused by *Chlamydia trachomatis*, *Treponema pallidum* or *Ureaplasma urealyticum*, chronic pulmonary infections in cystic fibrosis patients, and diseases caused by *Bordetella pertussis*, *Borrelia burgdorferi*, *Bartonella henselae*, *Campylobacter* spp., *Listeria monocytogenes*, *Rickettsia* spp., *Rhodococcus equi*, as well as *Mycobacterium avium-intracellulare* and other atypical mycobacterium. Macrolides have also been used to treat

## Abstract

This Minireview summarizes the changes in the field of bacterial resistance to macrolide, lincosamide, streptogramin, ketolide, and oxazolidinone (MLSKO) antibiotics since the nomenclature review in 1999. A total of 66 genes conferring resistance to this group of antibiotics has now been identified and includes 13 new rRNA methylase genes, four ATP-binding transporter genes coding for efflux proteins, and five new inactivating enzymes. During this same time period, 73 new genera carrying known rRNA methylase genes and 87 new genera carrying known efflux and/or inactivating genes have been recognized. The number of bacteria with mutations in the genes for 23S rRNA, L4 and L22 ribosomal proteins, resulting in reduced susceptibility to some members of the group of MLSKO antibiotics has also increased and now includes nine different Gram-positive and 10 different Gram-negative genera. New conjugative transposons carrying different MLSKO genes along with an increased number of antibiotics and/or heavy metal resistance genes have been identified. These mobile elements may play a role in the continued spread of the MLSKO resistance genes into new species, genera, and ecosystems.

diseases due to single cell eukaryotes such as *Babesia microti*, *Cryptosporidium parvum*, *Entamoeba histolytica*, *Pneumocystis carinii*, *Plasmodium* species, and *Toxoplasma gondii* (Iacoviello & Zinner, 2002). Macrolides influence bacterial virulence factors and cause reduction of adherence by *Moraxella catarrhalis* to ciliated epithelial cells, decreased adherence of *Neisseria meningitidis*, decreased binding of fibronectin to *Staphylococcus aureus*, and a variety of effects on *Pseudomonas aeruginosa* infecting cystic fibrosis patients. Macrolides also have anti-inflammatory characteristics which provide improvement in severe steroid-dependent asthma, diffuse pan-bronchiolitis, atheroma, cancer, and arthritis (Iacoviello & Zinner, 2002). A detailed review on macrolides as potent immunomodulators is now available (Giamarellos-Bourboulis, 2008).

Macrolides, lincosamides, streptogramins, ketolides (semi-synthetic derivatives of erythromycin A), and oxazolidinones (MLSKO), though chemically distinct, are usually considered together (Vester & Douthwaite, 2001; Zhanel *et al.*, 2001; Sutcliffe & Leclercq, 2003). The MLSK antibiotics share overlapping binding sites on the 50S subunit of

the ribosome, while linezolid binds to the 50S ribosomal subunit but is not affected by methylation of the *erm* genes (Franceschi *et al.*, 2004; Poehlsgaard & Douthwaite, 2005; Tu *et al.*, 2005). MLSKO antibiotics inhibit protein synthesis by binding to the 50S ribosomal subunit and blocking peptide bond formation and/or translation. More details on the interaction between these antibiotics and the ribosome can be found in a number of recent papers some of which are referenced in this review (Vester & Douthwaite, 2001; Lui & Douthwaite, 2002; Douthwaite *et al.*, 2005; Poehlsgaard & Douthwaite, 2005; Tu *et al.*, 2005). Shortly after the introduction of erythromycin in the 1950s into clinical practice, bacterial resistance to erythromycin was reported in *Staphylococci* (Zhanel *et al.*, 2001). Since then a large number of bacteria have been identified that are resistant to macrolides due to the presence of a number of different genes which included 13 identical or nearly identical genes (98–100% amino acid identity) which coded for the *erm*(B) rRNA methylase gene but had different names because there was no standardized nomenclature or criteria used (Roberts *et al.*, 1999). Much of this information including individual GenBank numbers, DNA, and amino acid homology within the gene class and association with particular plasmids or transposons can be found at <http://faculty.washington.edu/marilynr/>. To remedy this situation, colleagues and I wrote a review standardizing the nomenclature for genes which conferred resistance to macrolide, lincosamide, and streptogramin antibiotics which required that the new gene must be functional and have < 80% identity at the amino acid level with all previously characterized MLSKO genes (Roberts *et al.*, 1999; <http://faculty.washington.edu/marilynr/>). In addition, a nomenclature center was established that provides a central place to assign names to new genes

and a website was developed for the dissemination of information on resistance genes which encode for rRNA methylases, efflux and inactivating enzymes that confer resistance to MLSKO antibiotics. The site is modified twice a year or as needed, to reflect the ongoing changes in the field (<http://faculty.washington.edu/marilynr/>). The aim of this Minireview will be to focus on information available after the 1999 review was published (Roberts *et al.*, 1999). In the current review I have also included a section on mutations in the genes coding for 23S rRNA domain, L4 and L22 proteins since the majority of isolates with resistance to ketolide and/or oxazolidinones have been shown to carry mutations in one or more of these three genes. In addition, there is a section on new transposons and linkages between MLSKO resistance genes and other antibiotic and/or heavy metal resistance genes and their association with integrons or particular elements. The literature since 1999 is extensive and cannot be adequately referenced in this current Minireview. A more complete list of MLSKO references can be found with the following reviews and papers (Roberts, 1997, 2007; Vester & Douthwaite, 2001; Zhanel *et al.*, 2001; Wang *et al.*, 2003; Webber & Piddock, 2003; Sutcliffe & Leclercq, 2003; Roberts & Sutcliffe, 2005) and with updates at <http://faculty.washington.edu/marilynr/>.

### New resistance genes

There have been 22 new MLSKO-resistance genes identified since the 1999 publication which include 13 new genes coding for rRNA methylases, four genes coding for efflux proteins, four found coding for transferases, and one coding for a phosphorylase (Table 1).

**Table 1.** Mechanisms of MLS resistance genes

|                 | rRNA methylase                                                                                                                                                                                                                                                                                                                                 | Efflux                                                                                                                                                                                       | Inactivating enzymes                      |                                           |                                                                                                                               |                                                             |
|-----------------|------------------------------------------------------------------------------------------------------------------------------------------------------------------------------------------------------------------------------------------------------------------------------------------------------------------------------------------------|----------------------------------------------------------------------------------------------------------------------------------------------------------------------------------------------|-------------------------------------------|-------------------------------------------|-------------------------------------------------------------------------------------------------------------------------------|-------------------------------------------------------------|
|                 |                                                                                                                                                                                                                                                                                                                                                |                                                                                                                                                                                              | n = 19                                    |                                           |                                                                                                                               |                                                             |
| Time            | n = 33                                                                                                                                                                                                                                                                                                                                         | n = 14                                                                                                                                                                                       | Esterases<br>n = 2                        | Lysases<br>n = 2                          | Transferases<br>n = 11                                                                                                        | Phosphorylases<br>n = 4                                     |
| Listed in 1999* | n = 20<br><i>erm</i> (A), <i>erm</i> (B), <i>erm</i> (C), <i>erm</i> (D), <i>erm</i> (E)<br><i>erm</i> (F), <i>erm</i> (G), <i>erm</i> (H), <i>erm</i> (I), <i>erm</i> (N)<br><i>erm</i> (O), <i>erm</i> (Q), <i>erm</i> (R), <i>erm</i> (S), <i>erm</i> (T)<br><i>erm</i> (U), <i>erm</i> (V), <i>erm</i> (W), <i>erm</i> (X), <i>erm</i> (Y) | n = 10<br><i>car</i> (A), <i>msr</i> (A)<br><i>ole</i> (B), <i>ole</i> (C)<br><i>srm</i> (B), <i>tlr</i> (C), <i>vga</i> (A) <sup>†</sup> , <i>vga</i> (B)<br><i>lmr</i> (A), <i>mef</i> (A) | n = 2<br><i>ere</i> (A)<br><i>ere</i> (B) | n = 2<br><i>vgb</i> (A)<br><i>vgb</i> (B) | n = 7<br><i>lnu</i> (A), <i>lnu</i> (B)<br><i>vat</i> (A), <i>vat</i> (B)<br><i>vat</i> (C), <i>vat</i> (D)<br><i>vat</i> (E) | n = 3<br><i>mph</i> (A)<br><i>mph</i> (B)<br><i>mph</i> (c) |
| Not listed 1999 | n = 13<br><i>erm</i> (Z), <i>erm</i> (30), <i>erm</i> (31), <i>erm</i> (32), <i>erm</i> (33)<br><i>erm</i> (34), <i>erm</i> (35), <i>erm</i> (36), <i>erm</i> (37), <i>erm</i> (38)<br><i>erm</i> (39), <i>erm</i> (40), <i>erm</i> (41)                                                                                                       | n = 4<br><i>msr</i> (C), <i>msr</i> (D)<br><i>lsa</i> (A), <i>lsa</i> (B)                                                                                                                    | n = 0                                     | n = 0                                     | n = 4<br><i>lnu</i> (C), <i>lnu</i> (D)<br><i>lnu</i> (F), <i>vat</i> (F)                                                     | n = 1<br><i>mph</i> (D)                                     |

Data taken from <http://faculty.washington.edu/marilynr/> and other publications (Heir *et al.*, 2004; Roberts & Sutcliffe, 2005; Nash *et al.*, 2006; Novotna & Janata, 2006; Roberts, 2007).

\*Roberts *et al.* (1999).

<sup>†</sup>*vga*(A)<sub>lc</sub> is a variant of *vga*(A) but it is worth separating in Table 2 because it is the only recognized variant because of its' extended range in conferring resistance to streptogramin A and lincomycin (Novotna & Janata, 2006).

### rRNA methylases

Currently there are 66 MLSKO resistance genes and 33 *erm* genes that code for rRNA methylases which add one or two methyl groups to a single adenine (A2058 in *Escherichia coli*) in the 23S rRNA moiety and generally conferred resistance to macrolides, lincosamides, and streptogramin B antibiotics (MLS<sub>B</sub>) (Table 1) (Poehlsaard & Douthwaite, 2005). Out of the 33 *erm* genes, 13 are new including four which have been renamed; *erm*(Z) formerly *pikR1*, *erm*(31) formerly *pik2*, *erm*(32) formerly *tlr*(B), and *erm*(30) all from *Streptomyces*, and five innate methylase genes [*erm*(37), *erm*(38), *erm*(39), *erm*(40), and *erm*(41)] identified from different species of *Mycobacterium* which confer resistance to macrolides and lincosamides but not to streptogramin B (Nash *et al.*, 2006). The *erm*(33) gene, from *Staphylococcus* has 62% DNA and 58% amino acid homology to both an *erm*(A) and an *erm*(C) gene, respectively. The DNA sequence of *erm*(33) indicates that it was likely created by a recombination event between these two genes (Schwarz *et al.*, 2002). The remaining three genes, *erm*(34) from *Bacillus*, *erm*(35) from *Bacteriodes*, and *erm*(36) from *Micrococcus* may be found in other genera but currently have not been used extensively in screening resistant bacteria (Tables 1 and 2).

### Efflux proteins

There are now 14 different genes that code for either ATP-transporters or Major Facilitator Transporters and the genes produce proteins that pump one or more of the MLSKO antibiotics out of the cell (Table 1). Of the four new genes identified since 1999, one is an innate enterococcal gene [*msr*(C)], while the *msr*(D) gene is always found linked to the newly described efflux gene *mef*(A) and two genes, *lsa*(A) and *lsa*(B), coding for lincosamide efflux proteins (Tables 1 and 2) (Singh *et al.*, 2002; Kehrenberg *et al.*, 2004; Reynolds & Cove, 2005; Roberts & Sutcliffe, 2005). In addition, a variant *vga*(A)<sub>lc</sub> of the previously described *vga*(A) gene is listed in Tables 1 and 2 because unlike the *vga*(A) gene which confers resistance to streptogramin A, the *vga*(A)<sub>lc</sub> variant confers resistance to streptogramin A and lincomycin and thus merits a variant status (Novotna & Janata, 2006).

### Inactivation enzymes

Currently there are 19 inactivating enzymes including two esterases, two lyases, 11 transferases, and four phosphorylases. Of these 19, four genes coding for transferases and one gene coding for a phosphorylase were not in the 1999 review (Table 1) (Roberts *et al.*, 1999). Unfortunately the *mph*(D) phosphorylase gene had not been fully sequenced.

### Additional enzyme

Another 23S rRNA methyltransferase, encoded by *cfr* gene, and first identified on staphylococcal plasmids from animals should also be mentioned (Long *et al.*, 2006). This gene conferred resistance to lincosamides, oxazolidinones, streptogramin A, phenicols and pleuromutilins, but not macrolides, and thus differs from *erm* rRNA methylase genes and has not been included in Tables 1 and 2.

### Mutations

Over the past 10 years, an increasing number of isolates that are resistant to MLSKO antibiotics have been identified which contain mutations in the V domain of the 23S rRNA genes, and/or the genes coding the ribosomal proteins L4 and L22 (Franceschi *et al.*, 2004). The majority of telithromycin (ketolide) and/or linezolid (oxazolidinone) resistant bacteria carry mutations in one of these three genes (Garza-Ramos *et al.*, 2001; Jones *et al.*, 2002; Farrell *et al.*, 2004; Douthwaite *et al.*, 2005; Roberts & Sutcliffe, 2005; Toh *et al.*, 2007). These mutational changes have been described in both Gram-positive and Gram-negative bacteria (Table 3) and alter the function of the 23S rRNA and/or proteins resulting in moderately decreased susceptibility to one or more of the MLSKO antibiotics (Garza-Ramos *et al.*, 2001; Vester & Douthwaite, 2001; Jones *et al.*, 2002; Ng *et al.*, 2002; Sutcliffe & Leclercq, 2003; Farrell *et al.*, 2004; Lukehart *et al.*, 2004; Douthwaite *et al.*, 2005; Morozumi *et al.*, 2005; Tu *et al.*, 2005; Luthje & Schwarz, 2006; Binet & Maurelli, 2007; Florez *et al.*, 2007; Hong *et al.*, 2007; Mayrhofer *et al.*, 2007). These changes are normally passed to daughter cells during replication and generally not passed between strains or between different genera. *In vitro* selection experiments often obtained the same mutants as found in clinical isolates, while clinical strains carrying both mutations and one or more acquired MLSKO resistance genes has also been identified. Isolates with both mutations and acquired genes are often labeled as having acquired MLSKO resistance genes but not mutations which may lead to an under estimation of the number of resistant mutations in some studies.

### Mutations 23S rRNA

Mutations in the 23S rRNA can result in increased resistance to macrolides, lincosamides, streptogramin B, telithromycin and/or linezolid in both Gram-positive and Gram-negative bacteria (Sutcliffe & Leclercq, 2003; Poehlsaard & Douthwaite, 2005). Eight Gram-positive and nine Gram-negative genera, including the intracellular pathogen *C. trachomatis* and two *Treponema* species, have been identified with 23S rRNA mutations (Table 3). In addition, laboratory derived mutants have been selected in other species and genera (Pereyre *et al.*, 2007). Various mutations

**Table 2.** Distribution of MLS genes in new bacterial genera

| Gene                                                                                                                                                                 | Total # | Number of new genera since 1999 <sup>†</sup> | GenBank                         | Genera                                                                                                                                                                                                                                                                                                          |
|----------------------------------------------------------------------------------------------------------------------------------------------------------------------|---------|----------------------------------------------|---------------------------------|-----------------------------------------------------------------------------------------------------------------------------------------------------------------------------------------------------------------------------------------------------------------------------------------------------------------|
| <b>rRNA Methylases</b>                                                                                                                                               |         |                                              |                                 |                                                                                                                                                                                                                                                                                                                 |
| Confers resistance to macrolides, lincosamides, streptogramin B                                                                                                      |         |                                              |                                 |                                                                                                                                                                                                                                                                                                                 |
| <i>erm(A)</i>                                                                                                                                                        | 7       | 4                                            |                                 | <i>Bacteriodes, Helcococcus, Peptostreptococcus, Prevotella</i>                                                                                                                                                                                                                                                 |
| <i>erm(B)</i>                                                                                                                                                        | 33      | 23                                           |                                 | <i>Acinetobacter, Aerococcus, Arcanobacterium, Bacillus, Bacteriodes, Citrobacter, Corynebacterium, Enterobacter, Eubacterium, Fusobacterium, Gemella, Haemophilus Lactobacillus, Micrococcus, Pantoeae, Peptostreptococcus, Porphyromonas, Proteus, Pseudomonas, Ruminococcus, Rothia, Serratia, Treponema</i> |
| <i>erm(C)</i>                                                                                                                                                        | 16      | 8                                            |                                 | <i>Actinomyces, Bacteriodes, Corynebacterium, Enterococcus, Haemophilus, Micrococcus, Prevotella, Peptostreptococcus</i>                                                                                                                                                                                        |
| <i>erm(D)</i>                                                                                                                                                        | 2       | 1                                            |                                 | <i>Salmonella</i>                                                                                                                                                                                                                                                                                               |
| <i>erm(E)</i>                                                                                                                                                        | 6       | 5                                            |                                 | <i>Bacteroides, Eubacterium, Fusobacterium, Ruminococcus, Shigella</i>                                                                                                                                                                                                                                          |
| <i>erm(F)</i>                                                                                                                                                        | 24      | 8                                            |                                 | <i>Corynebacterium, Enterococcus, Lactobacillus, Mobiluncus, Peptostreptococcus, Ruminococcus, Shigella, Staphylococcus</i>                                                                                                                                                                                     |
| <i>erm(G)</i>                                                                                                                                                        | 7       | 5                                            |                                 | <i>Catenibacterium, Lactobacillus, Prevotella Porphyromonas, Staphylococcus</i>                                                                                                                                                                                                                                 |
| <i>erm(H)*</i>                                                                                                                                                       | 1       | 0                                            |                                 |                                                                                                                                                                                                                                                                                                                 |
| <i>erm(I)*</i>                                                                                                                                                       | 1       | 0                                            |                                 |                                                                                                                                                                                                                                                                                                                 |
| <i>erm(N)*</i>                                                                                                                                                       | 1       | 0                                            |                                 |                                                                                                                                                                                                                                                                                                                 |
| <i>erm(O)*</i>                                                                                                                                                       | 1       | 0                                            |                                 |                                                                                                                                                                                                                                                                                                                 |
| <i>erm(Q)</i>                                                                                                                                                        | 6       | 2                                            | L42817                          | <i>Bacteroides, Staphylococcus</i>                                                                                                                                                                                                                                                                              |
| <i>erm(R)*</i>                                                                                                                                                       | 1       | 0                                            |                                 |                                                                                                                                                                                                                                                                                                                 |
| <i>erm(S)*</i>                                                                                                                                                       | 1       | 0                                            |                                 |                                                                                                                                                                                                                                                                                                                 |
| <i>erm(T)</i>                                                                                                                                                        | 2       | 1                                            | AY894138                        | <i>Streptococcus</i>                                                                                                                                                                                                                                                                                            |
| <i>erm(U)*</i>                                                                                                                                                       | 1       | 0                                            |                                 |                                                                                                                                                                                                                                                                                                                 |
| <i>erm(V)</i>                                                                                                                                                        | 3       | 2                                            |                                 | <i>Eubacterium, Fusobacterium</i>                                                                                                                                                                                                                                                                               |
| <i>erm(W)*</i>                                                                                                                                                       | 1       | 0                                            |                                 |                                                                                                                                                                                                                                                                                                                 |
| <i>erm(X)</i>                                                                                                                                                        | 4       | 3                                            | NC_005206                       | <i>Arcanobacterium, Bifidobacterium Propionibacterium</i>                                                                                                                                                                                                                                                       |
| <i>erm(Y)*</i>                                                                                                                                                       | 1       | 0                                            |                                 |                                                                                                                                                                                                                                                                                                                 |
| <i>erm(Z)*</i>                                                                                                                                                       | 1       | 0                                            | AM709783 <sup>§</sup>           | <i>Streptomyces</i>                                                                                                                                                                                                                                                                                             |
| <i>erm(30)*</i>                                                                                                                                                      | 1       | 1                                            | AF079138                        | <i>Streptomyces</i>                                                                                                                                                                                                                                                                                             |
| <i>erm(31)*</i>                                                                                                                                                      | 1       | 1                                            | AF079138                        | <i>Streptomyces</i>                                                                                                                                                                                                                                                                                             |
| <i>erm(32)*</i>                                                                                                                                                      | 1       | 0                                            | AJ009971                        | <i>Streptomyces</i>                                                                                                                                                                                                                                                                                             |
| <i>erm(33)<sup>‡</sup></i>                                                                                                                                           | 1       | 1                                            | AJ313523                        | <i>Staphylococcus</i>                                                                                                                                                                                                                                                                                           |
| <i>erm(34)</i>                                                                                                                                                       | 1       | 1                                            | AY234334                        | <i>Bacillus</i>                                                                                                                                                                                                                                                                                                 |
| <i>erm(35)</i>                                                                                                                                                       | 1       | 1                                            | F319779                         | <i>Bacteriodes</i>                                                                                                                                                                                                                                                                                              |
| <i>erm(36)</i>                                                                                                                                                       | 1       | 1                                            | AF462611                        | <i>Micrococcus</i>                                                                                                                                                                                                                                                                                              |
| <i>erm(37)</i>                                                                                                                                                       | 1       | 1                                            | Z74025                          | <i>Mycobacterium</i>                                                                                                                                                                                                                                                                                            |
| <i>erm(38)</i>                                                                                                                                                       | 1       | 1                                            | AY154657                        | <i>Mycobacterium</i>                                                                                                                                                                                                                                                                                            |
| <i>erm(39)</i>                                                                                                                                                       | 1       | 1                                            | AY487229                        | <i>Mycobacterium</i>                                                                                                                                                                                                                                                                                            |
| <i>erm(40)</i>                                                                                                                                                       | 1       | 1                                            | AY570506                        | <i>Mycobacterium</i>                                                                                                                                                                                                                                                                                            |
| <i>erm(41)</i>                                                                                                                                                       | 1       | 1                                            | EU177504                        | <i>Mycobacterium</i>                                                                                                                                                                                                                                                                                            |
| <b>Efflux genes</b>                                                                                                                                                  |         |                                              |                                 |                                                                                                                                                                                                                                                                                                                 |
| Confers resistance to lincomycin, erythromycin or erythromycin + streptogramin B, olenadomycin, spiramycin, tylosin streptogramin A, or lincomycin + streptogramin A |         |                                              |                                 |                                                                                                                                                                                                                                                                                                                 |
| ATP-binding Transporters                                                                                                                                             |         |                                              |                                 |                                                                                                                                                                                                                                                                                                                 |
| <i>car(A)*</i>                                                                                                                                                       | 1       | 0                                            |                                 |                                                                                                                                                                                                                                                                                                                 |
| <i>msr(A)</i>                                                                                                                                                        | 7       | 6                                            |                                 | <i>Corynebacterium, Enterobacter, Enterococcus, Gemella, Pseudomonas, Streptococcus</i>                                                                                                                                                                                                                         |
| <i>msr(C)</i>                                                                                                                                                        | 1       | 1                                            | AY004350, AF313494<br>AJ243209  | <i>Enterococcus</i>                                                                                                                                                                                                                                                                                             |
| <i>msr(D)<sup>¶</sup></i>                                                                                                                                            | 20      | 20                                           | AF227521, SA318993,<br>AF274302 | <i>Acinetobacter, Bacteroides<sup>§</sup>, Citrobacter, Corynebacterium, Enterobacter, Enterococcus, Escherichia, Fusobacterium, Gemella, Klebsiella, Morganella, Neisseria, Proteus, Providencia, Pseudomonas, Ralstonia, Serratia, Staphylococcus, Streptococcus, Stenotrophomonas,</i>                       |
| <i>lsa(A)</i>                                                                                                                                                        | 1       | 1                                            | AY4225127                       | <i>Enterococcus</i>                                                                                                                                                                                                                                                                                             |
| <i>lsa(B)</i>                                                                                                                                                        | 1       | 1                                            | AJ579365                        | <i>Staphylococcus</i>                                                                                                                                                                                                                                                                                           |
| <i>ole(A)*</i>                                                                                                                                                       | 1       | 0                                            |                                 |                                                                                                                                                                                                                                                                                                                 |

Table 2. Continued.

| Gene                                                                          | Total # | Number of new genera since 1999 <sup>†</sup> | GenBank                           | Genera                                                                                                                                                                                                                                             |
|-------------------------------------------------------------------------------|---------|----------------------------------------------|-----------------------------------|----------------------------------------------------------------------------------------------------------------------------------------------------------------------------------------------------------------------------------------------------|
| <i>ole(B)*</i>                                                                | 1       | 0                                            |                                   |                                                                                                                                                                                                                                                    |
| <i>ole(C)*</i>                                                                | 1       | 0                                            |                                   |                                                                                                                                                                                                                                                    |
| <i>srm(B)*</i>                                                                | 1       | 0                                            |                                   |                                                                                                                                                                                                                                                    |
| <i>tlr(C)</i>                                                                 | 1       | 0                                            |                                   |                                                                                                                                                                                                                                                    |
| <i>vga(A)</i>                                                                 | 1       | 0                                            |                                   |                                                                                                                                                                                                                                                    |
| <i>vga(A)<sub>ic</sub><sup>  </sup></i>                                       | 1       | 1                                            | DQ823382                          | <i>Streptococcus</i>                                                                                                                                                                                                                               |
| <i>vga(B)</i>                                                                 | 2       | 1                                            |                                   | <i>Enterococcus</i>                                                                                                                                                                                                                                |
| Major facilitators                                                            |         |                                              |                                   |                                                                                                                                                                                                                                                    |
| <i>lmr(A)*</i>                                                                | 1       | 1                                            | X59926                            | <i>Streptomyces</i>                                                                                                                                                                                                                                |
| <i>mef(A)</i>                                                                 | 24      | 19                                           |                                   | <i>Acinetobacter, Bacteroides, Citrobacter, Enterobacter, Escherichia, Fusobacterium, Gemella, Klebsiella, Lactobacillus, Morganella, Neisseria, Pantoeae, Providencia, Proteus, Ralstonia, Pseudomonas, Salmonella, Serratia, Stenotrophomona</i> |
| Inactivating genes                                                            |         |                                              |                                   |                                                                                                                                                                                                                                                    |
| Esterases                                                                     |         |                                              |                                   |                                                                                                                                                                                                                                                    |
| Confers resistance (usually high level) to erythromycin                       |         |                                              |                                   |                                                                                                                                                                                                                                                    |
| <i>ere(A)</i>                                                                 | 11      | 7                                            |                                   | <i>Pantoeae, Providencia, Pseudomonas, Serratia, Staphylococcus, Stenotrophomonas, Vibrio</i>                                                                                                                                                      |
| <i>ere(B)</i>                                                                 | 8       | 5                                            |                                   | <i>Acinetobacter, Citrobacter, Enterobacter, Pseudomonas, Staphylococcus</i>                                                                                                                                                                       |
| Lyases                                                                        |         |                                              |                                   |                                                                                                                                                                                                                                                    |
| Confers resistance to streptogramin B, currently only in Gram-positive genera |         |                                              |                                   |                                                                                                                                                                                                                                                    |
| <i>vgb(A)</i>                                                                 | 2       | 0                                            |                                   |                                                                                                                                                                                                                                                    |
| <i>vgb(B)</i>                                                                 | 1       | 0                                            |                                   |                                                                                                                                                                                                                                                    |
| Transferases                                                                  |         |                                              |                                   |                                                                                                                                                                                                                                                    |
| Confers resistance to streptogramin A                                         |         |                                              |                                   |                                                                                                                                                                                                                                                    |
| <i>lnu(A)</i>                                                                 | 2       | 1                                            |                                   | <i>Clostridium</i>                                                                                                                                                                                                                                 |
| <i>lnu(B)</i>                                                                 | 3       | 2                                            | AJ238249                          | <i>Staphylococcus, Clostridium</i>                                                                                                                                                                                                                 |
| <i>lnu(C)</i>                                                                 | 1       | 1                                            | AY928180                          | <i>Streptococcus</i>                                                                                                                                                                                                                               |
| <i>lnu(D)</i>                                                                 | 1       | 1                                            | EF452177                          | <i>Streptococcus</i>                                                                                                                                                                                                                               |
| <i>lnu(F)</i>                                                                 | 2       | 2                                            | AJ561197                          | <i>Escherichia, Salmonella</i>                                                                                                                                                                                                                     |
| <i>vat(A)</i>                                                                 | 1       | 0                                            |                                   |                                                                                                                                                                                                                                                    |
| <i>vat(B)</i>                                                                 | 2       | 1                                            |                                   | <i>Enterococcus</i>                                                                                                                                                                                                                                |
| <i>vat(C)</i>                                                                 | 1       | 0                                            |                                   |                                                                                                                                                                                                                                                    |
| <i>vat(D)</i>                                                                 | 1       | 0                                            |                                   |                                                                                                                                                                                                                                                    |
| <i>vat(E)</i>                                                                 | 2       | 1                                            | AJ488494, NC_004566               | <i>Lactobacillus</i>                                                                                                                                                                                                                               |
| <i>vat(F)</i>                                                                 | 1       | 1                                            | AF170730                          | <i>Yersinia</i>                                                                                                                                                                                                                                    |
| Phosphorylases                                                                |         |                                              |                                   |                                                                                                                                                                                                                                                    |
| Confers resistance to macrolides                                              |         |                                              |                                   |                                                                                                                                                                                                                                                    |
| <i>mph(A)</i>                                                                 | 10      | 9                                            |                                   | <i>Aeromonas, Citrobacter, Enterobacter, Klebsiella, Pantoeae, Pseudomonas, Proteus, Serratia, Stenotrophomonas</i>                                                                                                                                |
| <i>mph(B)</i>                                                                 | 4       | 3                                            |                                   | <i>Enterobacter, Pseudomonas, Proteus</i>                                                                                                                                                                                                          |
| <i>mph(C)</i>                                                                 | 2       | 1                                            |                                   | <i>Stenotrophomonas</i>                                                                                                                                                                                                                            |
| <i>mph(D)</i>                                                                 | 6       | 6                                            | AB048591 only partially sequenced | <i>Escherichia, Klebsiella, Pantoeae, Proteus, Pseudomonas, Stenotrophomonas</i>                                                                                                                                                                   |

Data taken from <http://faculty.washington.edu/marilynr/> and other publications (Cousin *et al.*, 2003; Sutcliffe & Leclercq, 2003; Wang *et al.*, 2003; Heir *et al.*, 2004; Szczepanowski *et al.*, 2004; Roberts & Sutcliffe, 2005; Novotna & Janata, 2006; Nash *et al.*, 2006; Ghosh & LaPara, 2007; Mayrhofer *et al.*, 2007; Roberts, 2007).

\*Genes that have not been examined in surveillance studies.

<sup>†</sup>Roberts *et al.*, 1999.

<sup>‡</sup>Hybrid between *erm(A)* and *erm(C)* < 80% aa identity with either gene.

<sup>§</sup>Recently sequenced.

<sup>¶</sup>The *msr(D)* may not be functional in the *Bacteroides* isolate described (Wang *et al.*, 2003).

<sup>||</sup>Variant of *vga(A)* which confers resistance to lincomycin and streptogramin A rather than only streptogramin A, given variant status because of the change in resistance pattern.

**Table 3.** Mutations in 23S rRNA, L4, and/or L4 gene which increase MLSKO resistance

| Bacteria                                      | 23S rRNA | L4                | L22               |
|-----------------------------------------------|----------|-------------------|-------------------|
| Gram-positive and related genera              |          |                   |                   |
| <i>Arcanobacterium pyogenes</i>               | Yes      |                   |                   |
| <i>Bacillus subtilis</i>                      |          | Yes               | Yes               |
| <i>Enterococcus faecalis</i>                  | Yes*     | Yes               | Yes               |
| <i>Lactobacillus rhamonosus</i>               | Yes      |                   |                   |
| <i>Mycobacterium</i> spp. <sup>†</sup>        | Yes      |                   |                   |
| <i>Mycoplasma</i> spp. <sup>‡</sup>           | Yes      |                   |                   |
| <i>Propionibacterium</i> species <sup>§</sup> | Yes      |                   |                   |
| <i>Staphylococcus aureus</i>                  | Yes      |                   | Yes               |
| <i>Streptococcus pneumoniae</i>               | Yes      | Yes <sup>¶</sup>  | Yes               |
| <i>Streptococcus pyogenes</i>                 | Yes      | Yes               | Yes               |
| <i>Turicella</i>                              | Yes      |                   |                   |
| Gram-negative                                 |          |                   |                   |
| <i>Brachyspira hyodysenteriae</i>             | Yes      |                   |                   |
| <i>Bordetella pertussis</i>                   | Yes      |                   |                   |
| <i>Campylobacter jejuni</i>                   | Yes      | Yes <sup>  </sup> | Yes <sup>  </sup> |
| <i>Campylobacter coli</i>                     | Yes      | Yes <sup>  </sup> | Yes <sup>  </sup> |
| <i>Chlamydia trachomatis</i>                  | Yes      | Yes <sup>**</sup> |                   |
| <i>Escherichia coli</i>                       | Yes      | Yes               | Yes               |
| <i>Haemophilus influenzae</i>                 | Yes      | Yes               | Yes               |
| <i>Helicobacter pylori</i>                    | Yes      |                   |                   |
| <i>Neisseria gonorrhoeae</i>                  | Yes      |                   |                   |
| <i>Rickettsia</i> spp.                        |          |                   | Yes               |
| <i>Treponema palladium</i>                    | Yes      |                   |                   |
| <i>Treponema denticola</i>                    | Yes      |                   |                   |

Data taken from various publications (Boumghar *et al.*, 2008; Jensen *et al.*, 2000; Haroche *et al.*, 2002; Ng *et al.*, 2002; Gfeller *et al.*, 2003; Heir *et al.*, 2004; Morozumi *et al.*, 2005; Roberts & Sutcliffe, 2005; Garcia-Migura *et al.*, 2007). Most of the missing information above is due to lack of data on the genes coding for L4, L22 or rarely 23S rRNA and does not represent that no mutations have been identified. *In vitro* selected mutans with increased resistance to macrolides such as; *Ureaplasma parvum* (Pereyre *et al.*, 2007); *Chlamydia psittaci* have also been identified (Binet & Maurelli, 2007).

\*Decreased linezolid resistance also found.

<sup>†</sup>Includes *M. avium*, *M. chelonae*, *M. intracellulare*, *M. abscessum* *M. smegmatis*, *M. kansasii*.

<sup>‡</sup>Includes *M. hominis*, *M. gallisepticum*, and *M. pneumoniae*.

<sup>§</sup>Include *P. acnes*, *P. avidum*, *P. granulosum*.

<sup>¶</sup>6 bp deletion decreases linezolid, macrolide and chloramphenicol susceptibility (Wolter *et al.*, 2005).

<sup>||</sup>Not clear if associated with reduced susceptibility (Sutcliffe & Leclercq, 2003).

<sup>\*\*</sup>*In vitro* selected.

have been identified but the most common are in domain V with mutations at positions A2058 or A2059 the most frequently identified (*E. coli* numbering) (Vester & Douthwaite, 2001). Mutations in other positions within the domain V of the 23S rRNA have been associated with increased linezolid resistance. The first bacteria identified with mutations in their 23S rRNA had one or two copies of these genes such as *Mycobacterium* or *Helicobacter*. However, soon it was clear that other bacteria carrying more than two

gene copies were also acquiring mutations and there was a correlation between the number of *rrl* genes that carried mutations and level of resistance to MLSKO antibiotics. Detailed reviews on specific mutations have been published (Vester & Douthwaite, 2001; Sutcliffe & Leclercq, 2003; Franceschi *et al.*, 2004; Roberts & Sutcliffe, 2005). It is very likely that more species and genera carry mutations in the 23S rRNA than given in Table 3.

### Mutations in ribosomal proteins L4 and/or L22

There have been a number of mutations identified in the L4 and L22 ribosomal proteins and include single amino acid changes, insertion and/or deletion which add or delete one or more amino acids to these proteins (Table 3). Three Gram-positive and five Gram-negative genera with mutations in the L4 gene and four Gram-positive and five Gram-negative genera with mutations in the L22 gene have been described. Details of various mutations that confer macrolide resistance in *Streptococcus pneumoniae*, *Streptococcus pyogenes*, and *H. influenzae* can be found in Franceschi *et al.* (2004). It is very likely that Table 3 underestimates the number of species and genera which carry mutations in the L4 and/or L22.

### Mutations in intrinsic genes

Virtually all bacteria have multiple efflux pumps which import and export a variety of different compounds. As the understanding of intrinsic efflux pumps has increased it is clear that some of these pumps have roles in mediating low-moderate levels of antibiotic resistances in Gram-positive and Gram-negative bacteria (Webber & Piddock, 2003; Li & Nikaido, 2004). These efflux pumps use the proton motive force or ATP as energy sources for transporting multiple antibiotics, dyes, detergents, and disinfectants across the cell membrane. Exposure to any number of chemicals may lead to mutational changes that result in increased resistance to a variety of antibiotics. One example is triclosan, this anti-bacterial compound can be found in soap, toothpaste, and other products and can select for bacteria which have mutations in their efflux pumps and/or in genes that regulate expression of the genes coding for the efflux proteins. The *mtrR* gene encodes for a regulator protein that regulates transcription of the efflux proteins. Missense, deletions, and/or insertions within the *mtrR* gene, of *Neisseria gonorrhoeae*, increases resistance to multiple antibiotic resistant classes including macrolides (Zarantonelli *et al.*, 2001). Upstream of the *mtrR* a one base pair deletion of an adenine results in the loss of expression of the *mtrR* and leads to a four-fold increase in resistance to erythromycin, penicillin, and tetracycline (Zarantonelli *et al.*, 2001; Cousin *et al.*, 2003). This resistance is clinically relevant and can lead to treatment failures. In the 2005 surveillance, coordinated

by the Centers for Disease Control, 5.7% of the isolates had acquired antibiotic-resistance genes while 13.9% had chromosomal mediated mutational resistance in the United States (<http://www.cdc.gov/std/Gisp2005/GISPSurvSupp2005short.pdf>). In contrast, acquired resistance is much more prevalent in Asia (Tapsall, 2005). Thus illustrating that on occasion, mutational resistance may be more common for some bacteria in particular geographical areas than acquired resistance.

### Spread of acquired MLSKO genes and/or mutations

Currently 66 genes are listed in Table 1, 22 of which have been described in the past 9 years (Table 1). During this same time period, 73 new genera carrying known rRNA methylase genes and 87 new genera carrying known efflux and/or inactivating genes have been identified (Table 2). Twenty-three (35%) of the genes are now in multiple genera (2–33 genera) with 18 of the genes found in both Gram-positive and Gram-negative bacteria (Table 2). It is not clear why only some of the genes are found in multiple species and others are not. For example, the *Mycobacterium* and *Streptomyces erm* genes have a high > 70% G+C content, while the rest of the *erm* genes < 40% G+C content. It is possible that some of the *Streptomyces* genes are in *Mycobacterium* and/or *Nocardia* spp. similar to the tetracycline resistance *Streptomyces otr*(A), *otr*(B), *otr*(C) genes or vice versa, however, it is unlikely that the high % G+C *erm* genes will be found in other genera though the experiments have not been done (Chopra & Roberts, 2001). In other cases the genes have not been used in surveillance studies and may be found in more species than listed in Table 2. These genes are marked with an asterisk in Table 2.

### rRNA methylases

The rRNA methylases are the largest group of acquired MLSKO genes and include innate genes found in *Streptomyces*, where they provide a self-protective mechanism for these macrolide producers, and innate genes in naturally macrolide resistant *Mycobacterium* species (Nash *et al.*, 2006). Each species of *Mycobacterium* carries a unique *erm* gene and together with the *Streptomyces* genes have a > 70% G+C content, while the rest of the *erm* genes < 40% G+C content (Chopra & Roberts, 2001).

Ten *erm* genes have been identified in multiple genera with the *erm*(B) gene found in the widest host range, the most genera and in both Gram-positive and Gram-negative bacteria, aerobic, and anaerobic genera and in most ecosystems that have been examined (Table 2). This may be due to *erm*(B) genes association with mobile elements and linkage to a number of different genes (Table 4). The *erm*(B) gene

**Table 4.** MLS antibiotic resistance genes linked to other genes or elements

| Gene                            | Linkage                                   | Phenotype/element                       |                                         |
|---------------------------------|-------------------------------------------|-----------------------------------------|-----------------------------------------|
| <b>rRNA methylases</b>          |                                           |                                         |                                         |
| <i>erm</i> (B)                  | <i>tet</i> (M)                            | Tetracycline                            |                                         |
|                                 | <i>tet</i> (Q)                            | Tetracycline                            |                                         |
|                                 | <i>erm</i> (G)                            | MLS <sub>B</sub>                        |                                         |
|                                 | <i>mef</i> (A)                            | Erythromycin                            |                                         |
|                                 | <i>msr</i> (D)                            | Erythromycin                            |                                         |
|                                 | <i>cfr</i>                                | Lincosamide, linezolid, Streptogramin A |                                         |
|                                 |                                           | Chloramphenicol, florfenicol            |                                         |
|                                 | <i>aadE</i>                               | Streptomycin                            |                                         |
|                                 | <i>aphA-3</i>                             | Aminoglycoside                          |                                         |
|                                 | <i>lnu</i> (A)                            | Lincosamide                             |                                         |
|                                 | <i>vat</i> (A)                            | Streptogramin A                         |                                         |
|                                 | <i>vat</i> (B)                            | Streptogramin A                         |                                         |
|                                 | <i>vat</i> (D)                            | Streptogramin A                         |                                         |
| <i>tcrB</i>                     | Copper                                    |                                         |                                         |
| <i>merA</i>                     | Mercury reductase                         |                                         |                                         |
| <i>merX</i>                     | Mercury reductase                         |                                         |                                         |
| Tn1545, Tn5384*                 | Transposon                                |                                         |                                         |
| <i>mef</i> (A), Tn2009, Tn2010  | Macrolide                                 |                                         |                                         |
| <i>vanA</i>                     | Vancomycin, teicoplanin                   |                                         |                                         |
| <i>erm</i> (F)                  | <i>tet</i> (Q)                            | Tetracycline                            |                                         |
|                                 | <i>tet</i> (X)                            | Tetracycline                            |                                         |
|                                 | <i>rteA</i> , <i>rteB</i>                 | Regulatory genes                        |                                         |
| <i>erm</i> (G)                  | <i>orf1</i>                               | Unknown                                 |                                         |
|                                 | <i>tet</i> (Q)                            | Tetracycline                            |                                         |
|                                 | <i>mef</i> (A)                            | Erythromycin                            |                                         |
| <i>erm</i> (Y)                  | <i>msr</i> (D)                            | Erythromycin                            |                                         |
|                                 | <i>mph</i> (C)                            | Erythromycin                            |                                         |
| <i>erm</i> (33)                 | <i>cfr</i>                                | Lincosamide, linezolid, Streptogramin A |                                         |
|                                 |                                           | Chloramphenicol, florfenicol            |                                         |
|                                 | <i>lsa</i> (B)                            | Lincomycin                              |                                         |
| <b>ATP-binding Transporters</b> |                                           |                                         |                                         |
| <i>msr</i> (A)                  | <i>mph</i> (C)                            | Erythromycin                            |                                         |
|                                 | <i>erm</i> (Y)                            | MLS <sub>B</sub>                        |                                         |
| <i>msr</i> (D)                  | <i>mef</i> (A)                            | Erythromycin                            |                                         |
|                                 | <i>erm</i> (B)                            | MLS <sub>B</sub>                        |                                         |
|                                 | <i>orf6</i>                               | Unknown                                 |                                         |
|                                 | <i>tet</i> (M)                            | Tetracycline                            |                                         |
|                                 | <i>tet</i> (O)                            | Tetracycline                            |                                         |
|                                 | <i>catQ</i>                               | Chloramphenicol                         |                                         |
|                                 | Tn2009, Tn2010, Tn1207.1, Tn1207.3, MEGA† | Transposons                             |                                         |
|                                 | <i>lsa</i> (B)                            | <i>erm</i> (33)                         | MLS <sub>B</sub>                        |
|                                 |                                           | <i>cfr</i>                              | Lincosamide, linezolid, Streptogramin A |
|                                 |                                           |                                         | Chloramphenicol, florfenicol            |
| <b>Major Facilitators</b>       |                                           |                                         |                                         |
| <i>mef</i> (A)                  | <i>msr</i> (D)                            | Erythromycin                            |                                         |
|                                 | <i>erm</i> (B)                            | MLS <sub>B</sub>                        |                                         |
|                                 | <i>tet</i> (M)                            | Tetracycline                            |                                         |

**Table 4.** Continued.

| Gene           | Linkage                                                                            | Phenotype/element                                                                   |
|----------------|------------------------------------------------------------------------------------|-------------------------------------------------------------------------------------|
|                | <i>tet</i> (O)                                                                     | Tetracycline                                                                        |
|                | <i>orf3</i>                                                                        | Unknown                                                                             |
|                | Tn2009, Tn2010,<br>Tn1207.1, Tn1207.3,<br>MEGA <sup>†</sup>                        | Transposons                                                                         |
|                | <i>catQ</i>                                                                        | Chloramphenicol                                                                     |
| Esterases      |                                                                                    |                                                                                     |
| <i>ere</i> (A) | Class 1 integron <sup>‡</sup><br>Class 2 integron <sup>‡</sup>                     |                                                                                     |
|                | <i>sat</i>                                                                         | Streptothricin                                                                      |
|                | <i>aadA1</i>                                                                       | Aminoglycoside<br>adenyltransferase                                                 |
|                | <i>orfX</i>                                                                        | Unknown function                                                                    |
|                | <i>dfrA5</i>                                                                       | Trimethoprim                                                                        |
| Lyases         |                                                                                    |                                                                                     |
| <i>vgb</i> (B) | <i>vat</i> (C)<br><i>vat</i> (B)                                                   | Streptogramin A<br>Streptogramin A                                                  |
| Transferases   |                                                                                    |                                                                                     |
| <i>vat</i> (A) | <i>vgb</i> (A)                                                                     | Streptogramin B                                                                     |
| <i>vat</i> (B) | <i>vga</i> (B)<br><i>vat</i> (D)<br><i>vat</i> (E)                                 | Streptogramin A<br>Streptogramin A<br>Streptogramin A                               |
| <i>vat</i> (C) | <i>vgb</i> (B)                                                                     | Streptogramin B                                                                     |
| <i>vat</i> (D) | <i>vgb</i> (A)<br><i>erm</i> (B)<br><i>erm</i> (T)                                 | Streptogramin B<br>MLS <sub>B</sub><br>MLS <sub>B</sub>                             |
| <i>Inu</i> (A) | <i>erm</i> (B)<br><i>mph</i> (C)                                                   | MLS <sub>B</sub><br>Macrolides                                                      |
| <i>Inu</i> (F) | Class 1 integron <sup>‡</sup>                                                      |                                                                                     |
| Phosphorylases |                                                                                    |                                                                                     |
| <i>mph</i> (A) | <i>mrx</i><br><br><i>mphR</i> (A)<br>IS26, IS6100<br>Class 1 integron <sup>‡</sup> | Hydrophobic protein<br>Unknown function<br>Regulator protein<br>Insertion sequences |
| <i>mph</i> (C) | <i>cadD/cadA</i><br><i>mrs</i> (A)<br><i>erm</i> (Y)                               | Cadmium efflux<br>Erythromycin<br>MLS <sub>B</sub>                                  |

Data are from a number of publications (Gfeller *et al.*, 2003; Jensen *et al.*, 2000; Haroche *et al.*, 2002; Matsuoka *et al.*, 2003; Wang *et al.*, 2003; Brenciani *et al.*, 2004; Heir *et al.*, 2004; Hasman *et al.*, 2006; Poole *et al.*, 2006; De Graef *et al.*, 2007; Del Grosso *et al.*, 2007; Kehrenberg *et al.*, 2007; Mingoia *et al.*, 2007; Rice, 2007; Roberts, 2007; Jackson *et al.*, 2008).

\*Found in a number of Tn916-Tn1545-like transposons;

<sup>†</sup>found in a number of different transposons, these are just a few,

<sup>‡</sup>integron codes for an integrase (*int1*, *int2*) genes that code for proteins which mediate recombination between a recombination site (*attI*) and a target recombination sequence (*attC*: 59-base element).

was first identified in *Enterococcus* spp. from the 1950s and from *S. pneumoniae* in 1967 and has been identified in 23 new genera over the last 8 years (Roberts & Sutcliffe, 2005; <http://faculty.washington.edu/marilynr/>). The *erm*(B) gene is found in 33 different genera (Table 2) and has the widest host range of any of the acquired resistance genes listed in

Table 1. The *erm*(B) gene is associated with conjugative transposons located in chromosomes as well as on plasmids. The *erm*(B) gene has also been found on nonconjugative transposons such as Tn917 and Tn551. The next most common gene is *erm*(F) found in a total of 24 different genera many of which are anaerobes, including eight new genera. Interestingly, both the *erm*(B) and *erm*(F) genes have been identified in a 1955 *N. gonorrhoeae* isolate (Cousin *et al.*, 2003). The *erm*(C) was identified in eight new genera and in a total of 16 different genera, the *erm*(G) gene in seven genera including five new genera, the *erm*(A) gene has been found in seven genera of which four are new, the *erm*(E) gene has been found in six genera including five new genera, the *erm*(X) gene has been found in four genera including three new genera, the *erm*(Q) gene in six genera including two new genera, the *erm*(V) gene in three genera including two new genera, while the *erm*(T) gene is in two genera with one new (Table 2).

In the last 8 years, telithromycin resistant *S. pyogenes*, *S. aureus* and *S. epidermidis* have been reported (Farrell *et al.*, 2004). Each of these strains carried a constitutively expressed *erm*(A) or *erm*(B) gene. Douthwaite *et al.* (2005) found that there was variation in how well the *erm*(A) and *erm*(B) enzymes dimethylated the rRNA molecules within the host bacteria. The enzymes which had the greatest proportion of the rRNA molecules modified conferred the highest levels of telithromycin resistance with a range of MICs from 4 to > 64 µg mL<sup>-1</sup>, which explains the association between constitutively expressed *erm*(A) or *erm*(B) genes and ketolide resistance.

### Efflux genes

Among the efflux new genes the most prevalent was the *msr*(D) gene, which has been identified in 19 different genera, however, this gene always is downstream of the *mef*(A) gene and has been identified in 24 genera, of which 19 are new (Ojo *et al.*, 2006a). This suggests that every strain which carries a *mef*(A) gene should also carry the *msr*(D) gene and the presence of the *msr*(D) gene should be checked in all *mef*(A) positive Gram-positive and Gram-negative bacteria (Table 2). Among previously described efflux genes six new genera including Gram-positive and Gram-negative have been identified carrying *msr*(A) (Ojo *et al.*, 2006b).

### Inactivating genes

The new lincosamide transferases genes, *Inu*(C) and *Inu*(D) have both been characterized from *Streptococcus* spp. while *Inu*(F) gene has been found in *Escherichia* and *Salmonella* (Achard *et al.*, 2005; Petinaki *et al.*, 2008). The innate *vat*(F) gene codes for a streptogramin A acetyltransferase found in *Yersinia*, while the other *vat* genes are found



in Gram-positive bacteria and normally associated with plasmids (Seoane & Lobo, 2000). The new macrolide phosphorylase gene, *mph(D)* and is the only gene listed in Table 1 which has not been completely sequenced. The two erythromycin esterases, *ere(A)* and *ere(B)* genes, have been identified in seven Gram-positive and five new Gram-negative genera. Nine new Gram-negative genera carrying the macrolide phosphotransferases *mph(A)* gene, and three new Gram-negative genera carrying the *mph(B)* gene have been found (Table 2). The *mph(C)* gene has recently been identified in Gram-negative *Stenotrophomonas* and this is the only macrolide phosphotransferases found in both Gram-positive and Gram-negative bacteria. It would therefore be of interest to determine if the other *mph* genes are also found in Gram-negative genera. The transferase coded by the *vat(E)* gene has recently been found in *Lactobacillus fermentum* linked to an *erm(T)* gene and represents the first species other than *Streptococcus* spp. and *Enterococcus* spp. to carry a *vat* gene (Gfeller *et al.*, 2003).

### Other enzyme

The first bacterial isolate with a *cfr* gene was a bovine *Staphylococcus sciuri* isolated from a florfenicol surveillance study of animals (Schwarz *et al.*, 2000). More recently a methicillin and linezolid resistant *S. aureus* was isolated in 2005 from Columbia, South America from a patient. In this isolate the *cfr* gene was located downstream of an *erm(B)* gene and the two genes were co-transcribed from the *erm(B)* promoter (Toh *et al.*, 2007). This gene cluster was found in the chromosome flanked by an IS21-558 element, which has been implicated in the mobility of the *cfr* gene (Kehrenberg *et al.*, 2007). This *S. aureus* is also the first human linezolid resistant isolate characterized which is resistant due to the acquisition of an acquired resistance gene rather than to mutations. The identification of this human isolate suggests that more human strains with the *cfr* gene should be anticipated in the future.

### Mutations

The current mutations to the 23S rRNA ribosomal proteins L4 and L22 which confer increased resistance to MLSKO antibiotics are listed in Table 3. Both Gram-positive and Gram-negative species have been identified with mutations, however, only some of the bacteria listed have mutations in all three genes. This is most likely due to lack of available data rather than the actual lack of mutations in the bacteria listed. Some of these mutations also confer resistance to ketolides and oxazolidinone (Garza-Ramos *et al.*, 2001; Jones *et al.*, 2002; Liu & Douthwaite, 2002; Franceschi *et al.*, 2004; Farrell *et al.*, 2004; Douthwaite *et al.*, 2005; Hong *et al.*, 2007).

## Mobile elements and new linkages

Lateral gene exchange was demonstrated *c.* 50 years ago and it is hypothesized that gene exchange is the primary way most bacteria acquire and transfer antibiotic resistance genes between species, genera, and ecosystems (Watanabe, 1963). Mobile elements found in bacteria include plasmids, transposons, conjugative transposons, and integrons. All may carry one or more different genes which confer antibiotic resistances, resistance to one or more heavy metals, genes coding for enzymes which allow the host to utilize alternative energy sources, genes coding for the production of toxins, bacteriocins, and/or virulence factors, genes for self-replication, conjugative and/or mobilizable genes, and in some cases genes which confer susceptibility to specific bacteriophages. Some of the earliest plasmids were identified in Japanese *Shigella* spp. in the 1950s and conferred resistance to three or four different class of antibiotics. Plasmids differ in their bacterial host range with some such as those found in *Haemophilus* spp. having a very restrictive range that allows transfer between strains of a closely related species, to broad host range plasmids which are able to be transferred and survive in a variety of unrelated genera. In contrast, transposons and conjugative transposons tend to have broader host ranges, and less host restriction than plasmids (Roberts, 1989; Rice, 2007).

Conjugative transposons (CTns) are found in chromosomes and plasmids of a variety of bacterial species and in many ecosystems. They may carry multiple antibiotic resistance genes, multiple heavy metal resistance genes, and are widely disseminated in bacterial populations (Rice, 2007). The first CTn was Tn916, an 18 kb element that codes for tetracycline and minocycline resistance due to the *tet(M)* gene, and the first member of the Tn916-family of transposons. This and other CTns carry genes needed for their own conjugal transfer with integration into the new host relatively nonselectively in some species and highly site-specific in others (Rice, 2007). At about the same time a second transposon designated Tn1545 was described which carried multiple different antibiotic resistance genes including the rRNA methylase *erm(B)* gene and an *aphA-3* gene coding for kanamycin resistance (Courvalin & Carlier, 1987). Both of these genes were integrated downstream of the *tet(M)*. The Tn916-family of CTns has been identified in 27 different Gram-positive and 22 different Gram-negative genera. Many more genera have acquired the Tn916-like elements *in vitro*. More recently, composite transposons have been described where one or more transposons have been inserted within other transposons creating new multidrug resistant elements such as the composite element Tn5385. Tn5385 codes for tetracycline/minocycline, erythromycin, gentamicin, penicillin, streptomycin, and mercury resistance and shares genes with both staphylococcal and

enterococcal elements. An interesting feature of the composite elements is their ability to transfer as a single unit to a recipient or to transfer the inserted transposon separately thus allowing for different combinations of genes to transfer depending on which element was received (Rice, 2007).

New CTNs and plasmids have been described in the last few years which identify linkages between a variety of MLSKO and other genes. Some of the other genes and elements associated with acquired MLSKO genes are illustrated in Table 4. These include elements which link the *tet(M)*, *mef(A)*-*msr(D)* genes (Figueiredo *et al.*, 2006), the tetracycline resistant gene *tet(O)* linked upstream of the *mef(A)* and *msr(D)* genes (Brenciani *et al.*, 2004), the linkage between the *vat(E)* and *erm(B)* genes (Jensen *et al.*, 2000) and *erm(B)* and copper resistance genes (Hasman *et al.*, 2006).

CTNs may also play a role in maintaining specific genes in the bacterial population without selective pressure or without functioning in the particular bacteria. A good example can be found in the anaerobic *Bacteroides* spp. which often carry the *erm(F)* gene which confers resistance to the bacterial host and linked to a *tet(X)* gene, which codes for an enzyme that breaks down tetracycline in the presence of oxygen, but is nonfunctional in its anaerobic host (Chopra & Roberts, 2001). The hypothesis has been that the *erm(F)*-*tet(X)* genes which are now part of the CTnDOT element originated in an aerobic bacteria and was transferred as a unit to *Bacteroides* where the *tet(X)* gene product is non-functional. Recent data on a tetracycline resistant *Sphingobacterium* which carries the *tet(X)* gene, indicates that the genes flanking this *tet(X)* are the same genes as found flanking the *tet(X)* gene on the *Bacteroides* CTnDOT element except the *erm(F)* gene is missing in the *Sphingobacterium* isolate (Ghosh & LaPara, 2007; S. Ghosh, pers. Commun.). Thus, linkage between genes may be one way to keep non-expressed genes or genes which are currently not under selective pressure in bacterial populations.

### Mobile elements and MLSKO genes

Sixteen of the MLSKO resistance genes have been linked to other antibiotic or heavy metal resistance genes, class 1 or 2 integrons and/or specific transposons (Table 4). Linkage of various antibiotic resistance genes in one mobile element allows the recipient to be converted from a susceptible isolate to a multiple resistant one with the integration of mobile elements carrying multiple antibiotic resistance genes. Selection for transfer of these elements can be done using multiple different antibiotics or chemicals as was observed with the replacement of avoparcin with tylosin without changes in the level of avoparcin resistant enterococci. It was then determined that the same plasmid which carried the *vanA* gene cluster for avoparcin resistance also

carried an *erm(B)* gene which made the isolates resistant to tylosin. Therefore, when tylosin replaced avoparcin for animal use, the *vanA* gene remained because of its linkage with the *erm(B)* gene (Garcia-Migura *et al.*, 2007). However, some caution does need to be taken when thinking about co-selection and resulting carriage of antibiotic resistant bacteria as our study on children treated for caries illustrates (Roberts *et al.*, accepted). In this study, 75 children were treated with amalgam fillings and 75 were treated with composite fillings. Oral and urine cultures were taken before treatment, after treatment, and for 7 years of follow-up and then analyzed to determine whether the amalgam treated group had increased levels of antibiotic and/or mercury resistant commensal flora over baseline and higher levels than the control group treated with composite material. We found that there was no cultural evidence that children with amalgam fillings had higher levels of antibiotic or mercury resistant commensal oral or urinary bacteria as compared with the children treated with composite material.

### Future

Erythromycin was discovered over 60 years ago, but its use has diminished over time due to increased bacterial resistance. However, with the addition of the newer macrolide derivatives in the 1980s and more recently the ketolides and oxazolidinones, this group of antibiotics remains an important class of drugs for the treatment of a variety of community and hospital infectious diseases caused by Gram-positive and Gram-negative bacteria, and *Mycobacterium* spp. Dr Cohen (1992), The Centers for Disease Control in the USA, coined the phrase 'Post-Antimicrobial Era' over 10 years ago to mean a time when community and hospital acquired infections will primarily be due to multidrug resistant pathogens where few or no viable antibiotic therapies exist for treating infections that were once treatable. Disease due to multidrug resistant pathogens increases the morbidity, mortality, and cost associated with treatment of these infections and the number of these infections increases yearly. To illustrate this point a recent study on methicillin resistant *S. aureus* (MRSA) infections from 2005 in the United States estimated that > 90 000 MRSA infections occurred with > 18 000 associated deaths (Klevens *et al.*, 2007). This coupled with the low number of novel antibiotic classes currently in development, suggests that the 'post-antimicrobial era' is almost here for the industrialized world for some multidrug resistant pathogens and for practical purposes has already been reached in much of the developing world. In tune with this concern is the increased numbers of ketolide resistant streptococci, oxazolidinone resistant enterococci, and staphylococci which have been identified suggesting that these current new antibiotics will also lose their effectiveness as more bacteria become

resistant. Multiple strategies are needed to preserve the use of the currently effective MLSKO antibiotics. These strategies include the development of newer MLSKO derivatives, development of new classes of antibiotics and nonantibiotic therapies. Changes in infection control practices, personal hygiene, sanitation improvements, in agricultural and animal husbandry practices are also needed. In addition, a much better understanding is needed on how antibiotic resistance develops in different bacterial populations, why some of these genes spread quickly, and why others stay more localized. However, most importantly more resources are needed to monitor changes in antibiotic resistance patterns and the development of ways to extend the life of our current antibiotics such as using two different antibiotics for therapy instead of one antibiotic.

## References

- Achard A, Villers C, Pichereau V & Leclercq R (2005) New *lnu(C)* gene conferring resistance to lincomycin by nucleotidylation in *Streptococcus agalactiae* UCN36. *Antimicrob Agents Chemother* **49**: 2716–2719.
- Binet R & Maurelli AT (2007) Frequency of development and associated physiological cost of azithromycin resistance in *Chlamydia psittaci* 6BC and *C. trachomatis* L2. *Antimicrob Agents Chemother* **51**: 4267–4275.
- Boumghar-Bourtchai L, Chardon H, Malbruny B, Mezghani S, Severin C, Leclercq R & Dhalluin A (2008) Resistance to macrolides by ribosomal mutation in clinical isolates of *Turicella otitidis*. *Antimicrob Agents Chemother*, in press.
- Brenciani A, Ojo KK, Monachetti A, Menzo S, Roberts MC, Varaldo PE & Giovanetti E (2004) Distribution and molecular analysis of *mef(A)*-containing elements in tetracycline-susceptible and -resistant *Streptococcus pyogenes* clinical isolates with efflux-mediated erythromycin resistance. *J Antimicrob Chemother* **54**: 991–998.
- Chopra I & Roberts MC (2001) Tetracycline antibiotics: mode of action, applications, molecular biology and epidemiology of bacterial resistance. *Microbiol Mol Bio Rev* **65**: 232–260.
- Cohen ML (1992) Epidemiology of drug resistance: implications for a post-antimicrobial era. *Science* **257**: 1050–1055.
- Courvalin P & Carlier C (1987) Tn1545: a conjugative shuttle transposon. *Mol Gen Genet* **206**: 259–264.
- Cousin SL Jr, Whittington WLH & Roberts MC (2003) Acquired macrolide resistance genes in pathogenic *Neisseria* spp. isolated between 1940 and 1987. *Antimicrob Agents Chemother* **47**: 3877–3880.
- De Graef EM, Decostere A, De Leener E, Goossens H, Baele M & Haesbrouck F (2007) Prevalence and mechanism of resistance against macrolides, lincosamides, and streptogramins among *Enterococcus faecium* isolates from food-producing animals and hospital patients in Belgium. *Microb Drug Res* **13**: 135–141.
- Del Grosso M, Northwood JGE, Farrell DJ & Pantosti A (2007) The macrolide resistance genes *erm(B)* and *mef(E)* are carried by Tn2010 in dual-gene *Streptococcus pneumoniae* isolates belonging to clonal complex CC271. *Antimicrob Agents Chemother* **51**: 4184–4186.
- Douthwaite S, Jalava J & Jakobsen L (2005) Ketolide resistance in *Streptococcus pyogenes* correlates with the degree of rRNA dimethylation by Erm. *Mol Microbiol* **58**: 613–622.
- Farrell DJ, Morrissey I, Bakker S, Buckridge S & Felmingham D (2004) *In vitro* activities of telithromycin, linezolid, and quinupristin-dalfopristin against *Streptococcus pneumoniae* with macrolide resistance due to ribosomal mutations. *Antimicrob Agents Chemother* **48**: 3169–3171.
- Figueiredo TA, Aguiar SI, Melo-Cristino J & Ramirez M (2006) DNA methylase activity as a marker for the presence of a family of phage-like elements conferring efflux-mediated macrolide resistance in streptococci. *Antimicrob Agents Chemother* **50**: 3689–3694.
- Florez A-B, Ladero V, Alvarez-Martin P, Ammor M-S, Alvarez M-A & Baltasar M (2007) Acquired macrolide resistance in the human intestinal strain *Lactobacillus rhamnosus* E41 associated with a transition mutation in 23S rRNA genes. *Intern J Antimicrob Agents* **30**: 341–344.
- Franceschi F, Kanyo Z, Sherer EC & Sutcliffe J (2004) Macrolide resistance from the ribosome perspective. *Curr Drug Targets Infect Disord* **4**: 177–191.
- Garcia-Migura L, Liebana E & Jensen LB (2007) Transposon characterization of vancomycin-resistant *Enterococcus faecium* (VREF) and dissemination of resistance associated with transferable plasmids. *J Antimicrob Chemother* **60**: 263–268.
- Garza-Ramos G, Xiong L, Zhong P & Mankin A (2001) Binding site of macrolide antibiotics on the ribosome: new resistance mutation identifies a specific interaction of ketolides with rRNA. *J Bacteriol* **184**: 6898–6907.
- Giamarellos-Bourboulis EJ (2008) Macrolides beyond the conventional antimicrobials: a class of potent immunomodulators. *Intern J Antimicrob Agents* **31**: 12–20.
- Gfeller KY, Roth M, Meile L & Teuber M (2003) Sequence and genetic organization of the 19.3-kb erythromycin- and dalfopristin-resistance plasmid pLME300 from *Lactobacillus fermentum* ROT1. *Plasmid* **50**: 190–201.
- Ghosh S & LaPara TM (2007) The effects of subtherapeutic antibiotic use in farm animals on the proliferation and persistence of antibiotic resistance among soil bacteria. *ISMEJ* **1**: 191–203.
- Hasman H, Kempf I, Chidaine B, Cariollet R, Ersboll AK, Houe H, Hansen HCB & Aarestrup FM (2006) Copper resistance in *Enterococcus faecium*, mediated by the *tcrB* gene, is selected by supplementation of pig feed with copper sulfate. *Appl Environ Microbiol* **72**: 5784–5789.
- Haroche J, Alligent J & El Solh N (2002) Tn5406, a new staphylococcal transposon conferring resistance to streptogramin A and related compounds including dalfopristin. *Antimicrob Agents Chemother* **46**: 2337–2343.

- Heir E, Lindstedt B-A, Leegaard TM, Gjernes E & Kapperud G (2004) Prevalence and characterization of integrons in blood culture *Enterobacteriaceae* and gastrointestinal *Escherichia coli* in Norway and reporting of a novel class I integron-located lincosamide resistance gene. *Ann Clin Microbiol Antimicrob* **3**: 12–20.
- Hong T, Li X, Wang J, Sloan C & Cicogna C (2007) Sequential linezolid-resistant *Staphylococcus epidermidis* isolates with G2576T mutation. *J Clin Microbiol* **45**: 3277–3280.
- Iacoviello VR & Zinner SH (2002) Macrolides: a clinical overview. *Macrolide Antibiotics* (Schonfeld W & Kirst HA, eds), pp. 15–24. Birkhauser Verlag, Basel.
- Jackson CR, Fedorka-Cray PJ, Barrett JB & Woodley TA (2008) First report of *vatB* and *vgaB* from *Enterococcus gallinarum* in the USA. *Intern J Antimicrob Agents* **31**: 175–187.
- Jensen LB, Hammerum AM & Aarestrup FM (2000) Linkage of *vat*(E) and *erm*(B) in streptogramin-resistant *Enterococcus faecium* isolates from Europe. *Antimicrob Agents Chemother* **44**: 2231–2232.
- Jones RN, Della-Latta P, Lee LV & Biedenbach DJ (2002) Linezolid-resistant *Enterococcus faecium* isolated from a patient without prior exposure to an oxazolidinone: report from the SENTRY antimicrobial surveillance program. *Diagn Microbiol Infect Dis* **42**: 137–139.
- Kehrenberg C, Ojo KK & Schwarz S (2004) Nucleotide sequence and organization of the multiresistance plasmid pSCFS1 from *Staphylococcus sciuri*. *J Antimicrob Chemother* **54**: 936–939.
- Kehrenberg C, Aarestrup FM & Schwarz S (2007) IS21-558 insertion sequences are involved in the mobility of the multiresistance gene *cfr*. *Antimicrob Agents Chemother* **51**: 483–487.
- Kirst HA (2002) Introduction to the macrolide antibiotics. *Macrolide Antibiotics* (Schonfeld W & Kirst HA, eds), pp. 1–14. Birkhauser Verlag, Basel.
- Klevens RM, Morrison MA, Nadle J *et al.* (2007) Invasive methicillin-resistant *Staphylococcus aureus* infection in the United States. *JAMA* **298**: 1763–1771.
- Li XZ & Nikaido H (2004) Efflux-mediated drug resistance in bacteria. *Drugs* **64**: 159–204.
- Long KS, Poehlsgaard J, Kehrenberg C, Schwarz S & Vester B (2006) The *cfr* rRNA methyltransferase confers resistance to phenicols, lincosamides, oxazolidinones, pleuromutilins, and streptogramin A antibiotics. *Antimicrob Agents Chemother* **50**: 2500–2505.
- Lukehart SA, Godornes C, Molini BJ *et al.* (2004) Macrolide resistance in *Treponema pallidum* in the United States and Ireland. *N Engl J Med* **351**: 154–158.
- Lui M & Douthwaite DS (2002) Activity of the ketolide telithromycin is refractory to *erm* monomethylation of bacterial rRNA. *Antimicrob Agents Chemother* **46**: 1629–1633.
- Luthje P & Schwarz S (2006) Antimicrobial resistance of coagulase-negative staphylococci from bovine subclinical mastitis with particular reference to macrolide-lincosamide resistance phenotypes and genotypes. *J Antimicrob Chemother* **57**: 966–969.
- Matsuoka M, Inoue M, Endo Y & Nakajima Y (2003) Characteristic expression of three genes, *msr*(A), *mph*(C), and *erm*(Y), that confer resistance to macrolide antibiotics on *Staphylococcus aureus*. *FEMS Microbiol Lett* **220**: 287–293.
- Mayrhofer S, Domig KJ, Amtman E, van Hoek AHAM, Petersson A, Mair C, Mayer HK & Kneifel W (2007) Antibiotic susceptibility of *Bifidobacterium thermophilum* and *Bifidobacterium pseudolongum* isolates from animal sources. *J Food Prot* **70**: 119–124.
- Mingoa M, Vecchi M, Cochetti I, Tili E, Vitali LA, Manzin A, Valardo PE & Montanari MP (2007) Composite structure of *Streptococcus pneumoniae* containing the erythromycin efflux resistance gene *mef*(I) and the chloramphenicol resistance gene *catQ*. *Antimicrob Agents Chemother* **51**: 3983–3987.
- Morozumi M, Hasegawa K, Kobayashi R *et al.* (2005) Emergence of macrolide-resistant *Mycoplasma pneumoniae* with a 23S rRNA gene mutations. *Antimicrob Agents Chemother* **49**: 2302–2306.
- Nash KA, Andini N, Zhang Y, Brown-Elliott BA & Wallace RJ Jr (2006) Intrinsic macrolide resistance in rapidly growing mycobacteria. *Antimicrob Agents Chemother* **50**: 3476–3478.
- Ng L-K, Martin I, Liu G & Bryden L (2002) Mutations in 23S rRNA associated with macrolide resistance in *Neisseria gonorrhoeae*. *Antimicrob Agents Chemother* **46**: 3020–3025.
- Novotna G & Janata J (2006) A new evolutionary variant of the streptogramin A resistance protein, *Vga*(A)<sub>LC</sub>, from *Staphylococcus haemolyticus* with shifted substrate specificity towards lincosamides. *Antimicrob Agents Chemother* **50**: 4070–4076.
- Ojo KK, Ruehlen NL, Close NS, Luis H, Bernardo M, Leitao J & Roberts MC (2006a) The presence of a conjugative Gram-positive Tn2009 in Gram-negative commensal bacteria. *J Antimicrob Chemother* **57**: 1065–1069.
- Ojo KK, Striplin MJ, Ulep C, Close NS, Zittle J, Luis H, Bernardo M, Leitao J & Roberts MC (2006b) *Staphylococcus* macrolide efflux *msr*(A) gene characterized in *Streptococcus*, *Enterococcus*, *Corynebacterium*, and *Pseudomonas* isolates. *Antimicrob Agents Chemother* **50**: 1089–1091.
- Pereyre S, Metifiot M, Cazanave C, Renaudin H, Charron A, Bebear C & Bebear CM (2007) Characterisation of *in vitro*-selected mutants of *Ureaplasma parvum* resistant to macrolides and related antibiotics. *Intern J Antimicrob Agents* **29**: 207–211.
- Petinaki E, Guerin-Faublee V, Pichereau V, Villers C, Achard A, Malbrunoy B & Leclercq R (2008) Lincomycin Resistance Gene *lnu*(D) in *Streptococcus uberis*. *Antimicrob Agents Chemother* **52**: 626–630.
- Poehlsgaard J & Douthwaite S (2005) The bacterial ribosome as a target for antibiotics. *Nat Rev Microbiol* **3**: 870–880.
- Poole TL, Callaway TR, Bischoff KM, Warnes CE & Nisbet DJ (2006) Macrolide inactivation gene cluster *mphA-mrx-mphR* adjacent to a class I integron in *Aeromonas hydrophila* isolated from a diarrhoeic pig in Oklahoma. *J Antimicrob Chemother* **57**: 31–38.

- Reynolds E & Cove JH (2005) Enhanced resistance to erythromycin is conferred by the enterococcal *msrC* determinant in *Staphylococcus aureus*. *J Antimicrob Chemother* **55**: 260–264.
- Rice LB (2007) Conjugative transposons. *Enzyme-mediated Resistance to Antibiotics: Mechanisms, Dissemination, and Prospects for Inhibition* (Bonomo RA & Tolmashy M, eds). pp. 271–284. ASM Press, Washington, DC.
- Roberts MC (1989) Gene transfer in the urogenital and respiratory tract. *Gene Transfer in the Environment* (Levy SB & Miller RV, eds). pp. 347–375. McGraw-Hill Publishing Co, New York, NY.
- Roberts MC (1997) Genetic mobility and distribution of tetracycline resistance determinants. Antibiotic resistance: origins, evolution, selection and spread. *Ciba Foundation Symposium 207* (Chadwick DJ & Goode J, eds) pp. 206–218. John Wiley & Sons, Chichester, UK.
- Roberts MC (2007) rRNA methylases and resistance to macrolide, lincosamide, streptogramin, ketolide and oxazolidinone (MLSKO) antibiotics. *Enzyme-Mediated Resistance to Antibiotics: Mechanisms, Dissemination, and Prospects for Inhibition* (Bonomo RA & Tolmashy ME, eds). pp. 53–63. American Society for Microbiology, Washington, DC.
- Roberts MC & Sutcliffe J (2005) Macrolide, lincosamide, streptogramin, ketolide and oxazolidinone resistance. *Frontiers in Antibiotic Resistance: A Tribute to Stuart B. Levy* (White DG, Alekshun MN & McDermott PF, eds), pp. 66–83. American Society for Microbiology, Washington, DC.
- Roberts MC, Sutcliffe J, Courvalin P, Jensen LB, Rood J & Seppala H (1999) Nomenclature for macrolide and macrolide-lincosamide streptogramin B antibiotic resistance determinants. *Antimicrob Agents Chemother* **43**: 2823–2830.
- Roberts MC, Leroux GB, Sampson J, Luis H, Bernardo M & Leitao J (2008) Dental amalgam antibiotic and/or mercury resistant bacteria. *J Dent Res* **87**: 475–479.
- Schwarz S, Kehrenberg C & Ojo KK (2002) *Staphylococcus sciuri* gene *erm(33)*, encoding inducible resistance to macrolides, lincosamides, and streptogramin B antibiotics, is a product of recombination between *erm(C)* and *erm(A)*. *Antimicrob Agents Chemother* **46**: 3621–3623.
- Schwarz S, Wreckenthin C & Kehrenberg C (2000) Identification of plasmid-borne chloramphenicol-florfenicol resistance gene in *Staphylococcus sciuri*. *Antimicrob Agents Chemother* **44**: 2530–2533.
- Seoane A & Lobo JMG (2000) Identification of a streptogramin A acetyltransferase gene in the chromosome of *Yersinia enterocolitica*. *Antimicrob Agents Chemother* **44**: 905–909.
- Singh KV, Weinstock GM & Murray BE (2002) An *Enterococcus faecalis* ABC homologue (*Lsa*) is required for the resistance of this species to clindamycin and quinupristin-dalfopristin. *Antimicrob Agents Chemother* **46**: 1854–1850.
- Sutcliffe JA & Leclercq R (2003) Mechanisms of resistance to macrolides, lincosamides and ketolides. *Macrolide Antibiotics* (Schonfeld W & Kirst HA, eds) pp. 281–317. Birkhauser Verlag, Basel.
- Szczepanowski R, Krahn I, Linke B, Goesmann A, Puhler A & Schluter A (2004) Antibiotic multiresistance plasmid pRSB101 isolated from a wastewater treatment plant is related to plasmids residing in phytopathogenic bacteria and carries eight different resistance determinants including a multidrug transport system. *Microbiol* **150**: 3613–3630.
- Tapsall JW (2005) Antibiotic resistance in *Neisseria gonorrhoeae*. *Clin Infect Dis* **41**: S263–S268.
- Toh S-M, Xiong L, Arias CA, Villegas MC, Lolans K, Quinn J & Mankin AS (2007) Acquisition of a natural resistance gene renders a clinical strain of methicillin-resistant *Staphylococcus aureus* resistant to the synthetic antibiotic linezolid. *Mol Microbiol* **64**: 1506–1514.
- Tu D, Blaha G, Moore PB & Steitz TA (2005) Structures of MLSBK antibiotics bound to mutated large ribosomal subunits provide a structural explanation for resistance. *Cell* **121**: 257–270.
- Vester B & Douthwaite S (2001) Macrolide resistance conferred by base substitutions in 23S rRNA. *Antimicrob Agents Chemother* **45**: 1–12.
- Wang Y, Wang GR, Selby A, Shoemaker HNB & Salyers AA (2003) A newly discovered *Bacteroides* conjugative transposon, CTnGERM1, contains genes also found in gram-positive bacteria. *Appl Environ Microbiol* **69**: 4594–4603.
- Watanabe T (1963) Infective heredity of multiple drug resistance in bacteria. *Bacteriol Rev* **27**: 87–115.
- Webber MA & Piddock LJV (2003) The importance of efflux pumps in bacterial antibiotic resistance. *J Antimicrob Chemother* **51**: 9–11.
- Wolter N, Smith AM, Farrell DJ, Schaffner W, Moore M, Whitney CG, Jorgensen JH & Klugman KP (2005) Novel mechanism of resistance to oxazolidinone, macrolides and chloramphenicol in ribosomal protein L4 of the pneumococcus. *Antimicrob Agents Chemother* **49**: 3354–3357.
- Zarantonelli L, Borthagaray G, Lee EH, Veal W & Shafer WM (2001) Decrease susceptibility to azithromycin and erythromycin mediated by a novel *mtr(R)* promoter mutation in *Neisseria gonorrhoeae*. *J Antimicrob Chemother* **47**: 651–654.
- Zhanel GG, Dueck M, Hoban DJ, Vercaigne LM, Embil JM, Gin AS & Karlowsky JA (2001) Review of macrolides and ketolides: focus on respiratory tract infections. *Drugs* **61**: 443–498.
